# Supplementary material
Source: PubMed Central journal article supplement (PMC4950792)
Supplement: BPH-172-5251-s001.pdf [file BPH-172-5251-s001.pdf]

Supporting information

## Role of endothelial TRPV4 channels in vascular actions of the endocannabinoid, 2-arachidonoylglycerol

W S V Ho, X Zheng, D X Zhang

Supplementary Figure S1

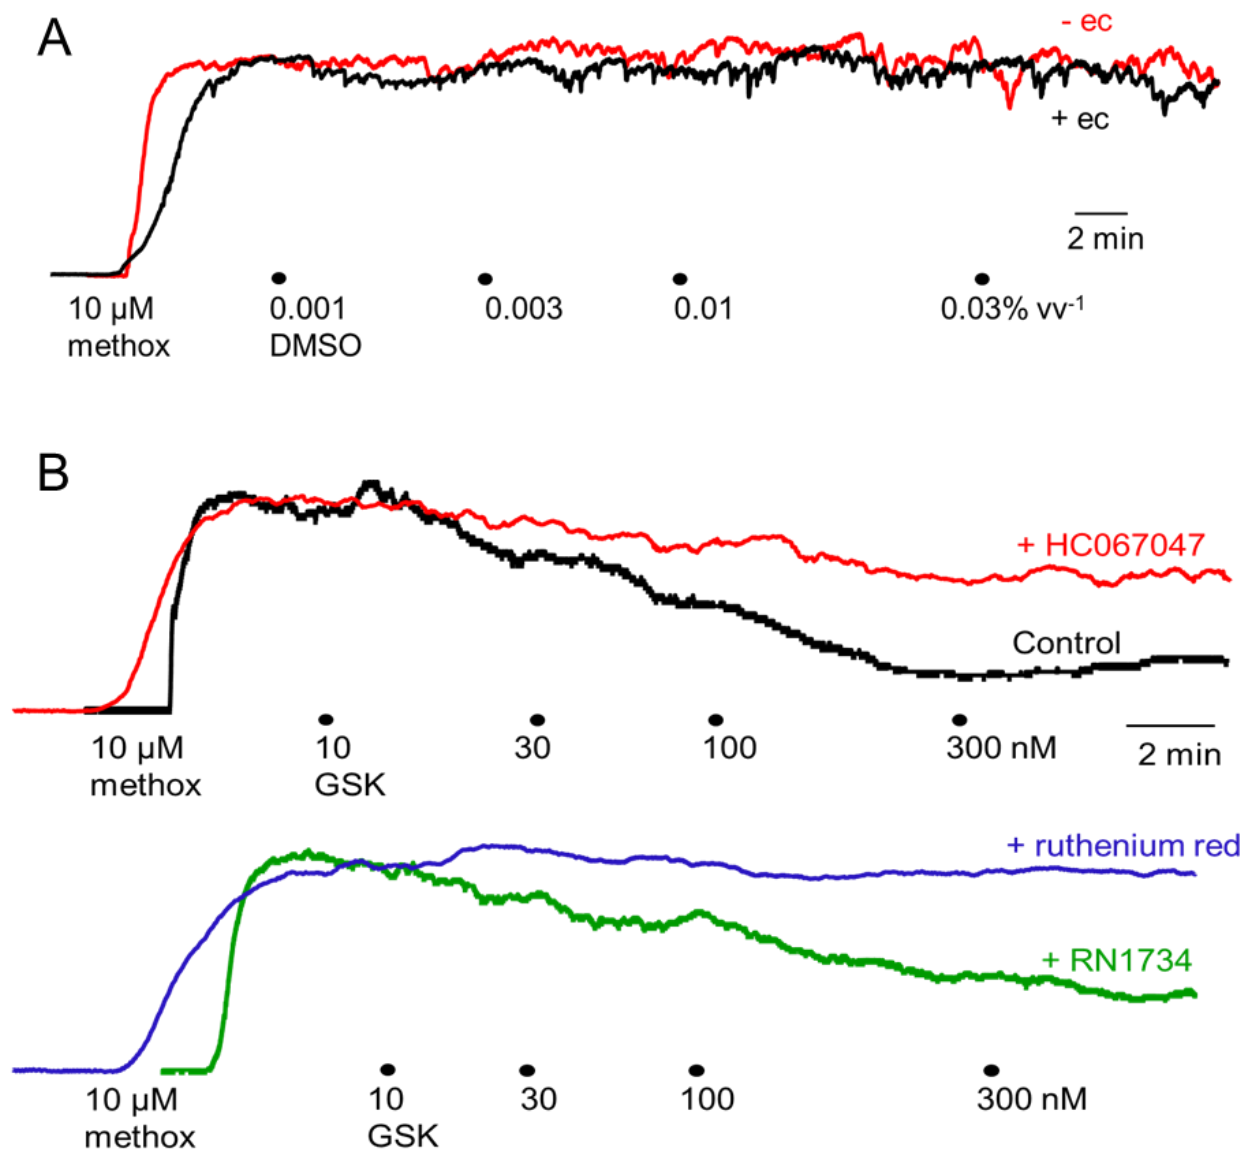

Supplementary Figure S2

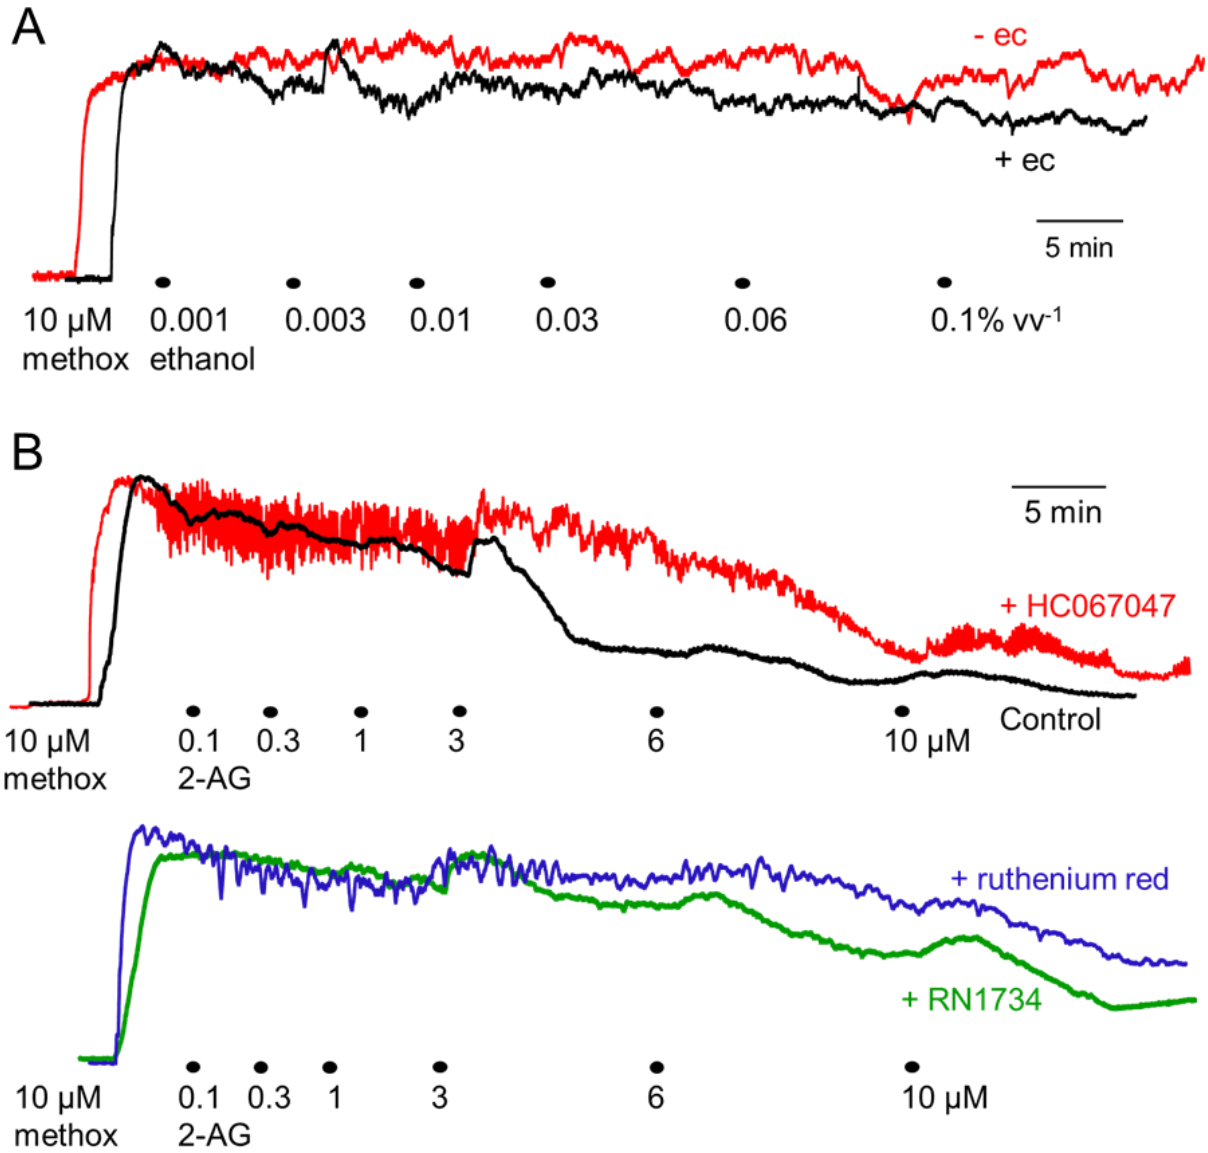

Supplementary Figure S3

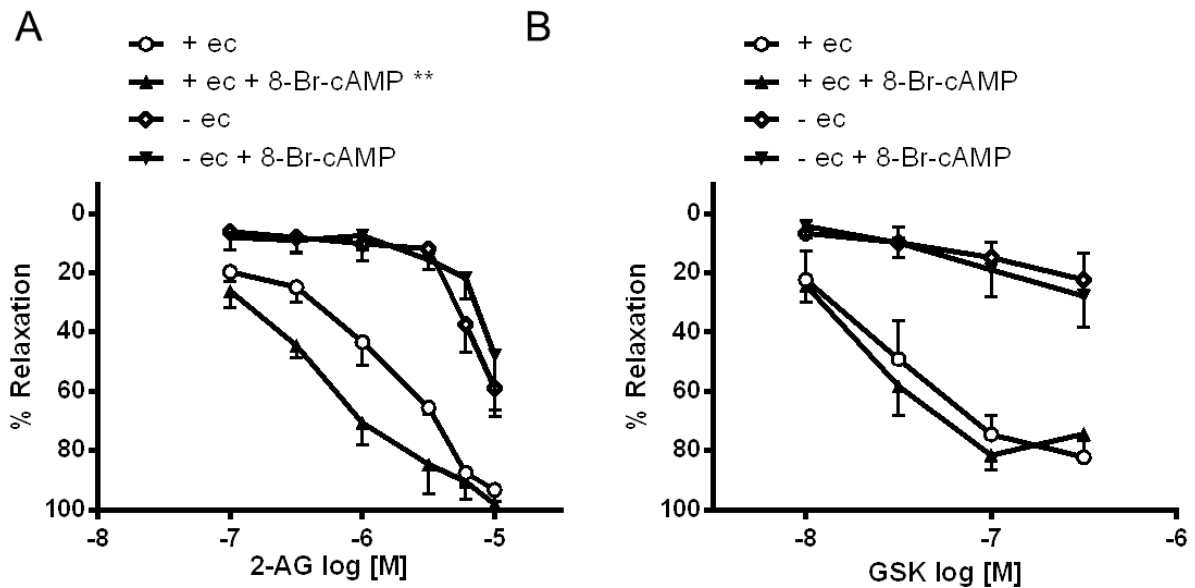

Supplementary Figure legends

Figure S1. (A) Original traces showing the effects of vehicle for GSK (0.001-0.03%  $v v^{-1}$  DMSO) in endothelium-intact and endothelium-denuded mesenteric arteries precontracted with 10  $\mu M$  methoxamine (methox). (B) Original traces showing the relaxant effects of GSK, in the absence and presence of a TRPV4 antagonist (1  $\mu M$  HC067047, 20  $\mu M$  RN1734 or 10  $\mu M$  ruthenium red).

Figure S2. (A) Original traces showing the effects of vehicle for 2-AG (0.001-0.1%  $v v^{-1}$  ethanol) in endothelium-intact and endothelium-denuded mesenteric arteries precontracted with 10  $\mu M$  methoxamine (methox). (B) Original traces showing the relaxant effects of 2-AG, in the absence and presence of a TRPV4 antagonist (1  $\mu M$  HC067047, 20  $\mu M$  RN1734 or 10  $\mu M$  ruthenium red).

Figure S3. Effects of 8-Br-cAMP (1  $\mu M$ ; PKA activator) on relaxation to (A) 2-AG and (B) GSK in endothelium-intact and endothelium-denuded mesenteric arteries.  $n = 4-5$ . Values are shown as means and vertical bars represent s.e.mean. The data were analysed by two-way ANOVA, followed by Bonferroni post-hoc test.  $**P < 0.01$  in comparison to control.
